# Supplementary material for: The copper centers of tyramine β-monooxygenase and its catalytic-site methionine variants: an X-ray absorption study
Source: PubMed Central journal article supplement — J Biol Inorg Chem. 2010 Jun 11;15(8):1195–207. doi: 10.1007/s00775-010-0677-3 (PMC2988203; doi:10.1007/s00775-010-0677-3), 2010-06-11

# **The Copper Centers of Tyramine $\beta$ -monooxygenase and Its Catalytic-Site Methionine Variants. An X-Ray Absorption Study<sup>†</sup>.**

Corinna Hess<sup>§¶</sup>, Judith P. Klinman<sup>§</sup>, and Ninian J. Blackburn<sup>‡\*</sup>

Department of Science and Engineering, School of Medicine, Oregon Health and Sciences University, Beaverton, Oregon 97006, and Department of Chemistry, University of California at Berkeley, Berkeley, CA 94720

## **Supporting Information**

Table S1 and Figs S1 - 2



Figure S1. Experimental versus simulated Fourier transform and EXAFS (inset) for reduced TBM at pH 7 using two shells of non-equivalent histidines, with the parameters as listed in fit B of Table S1.

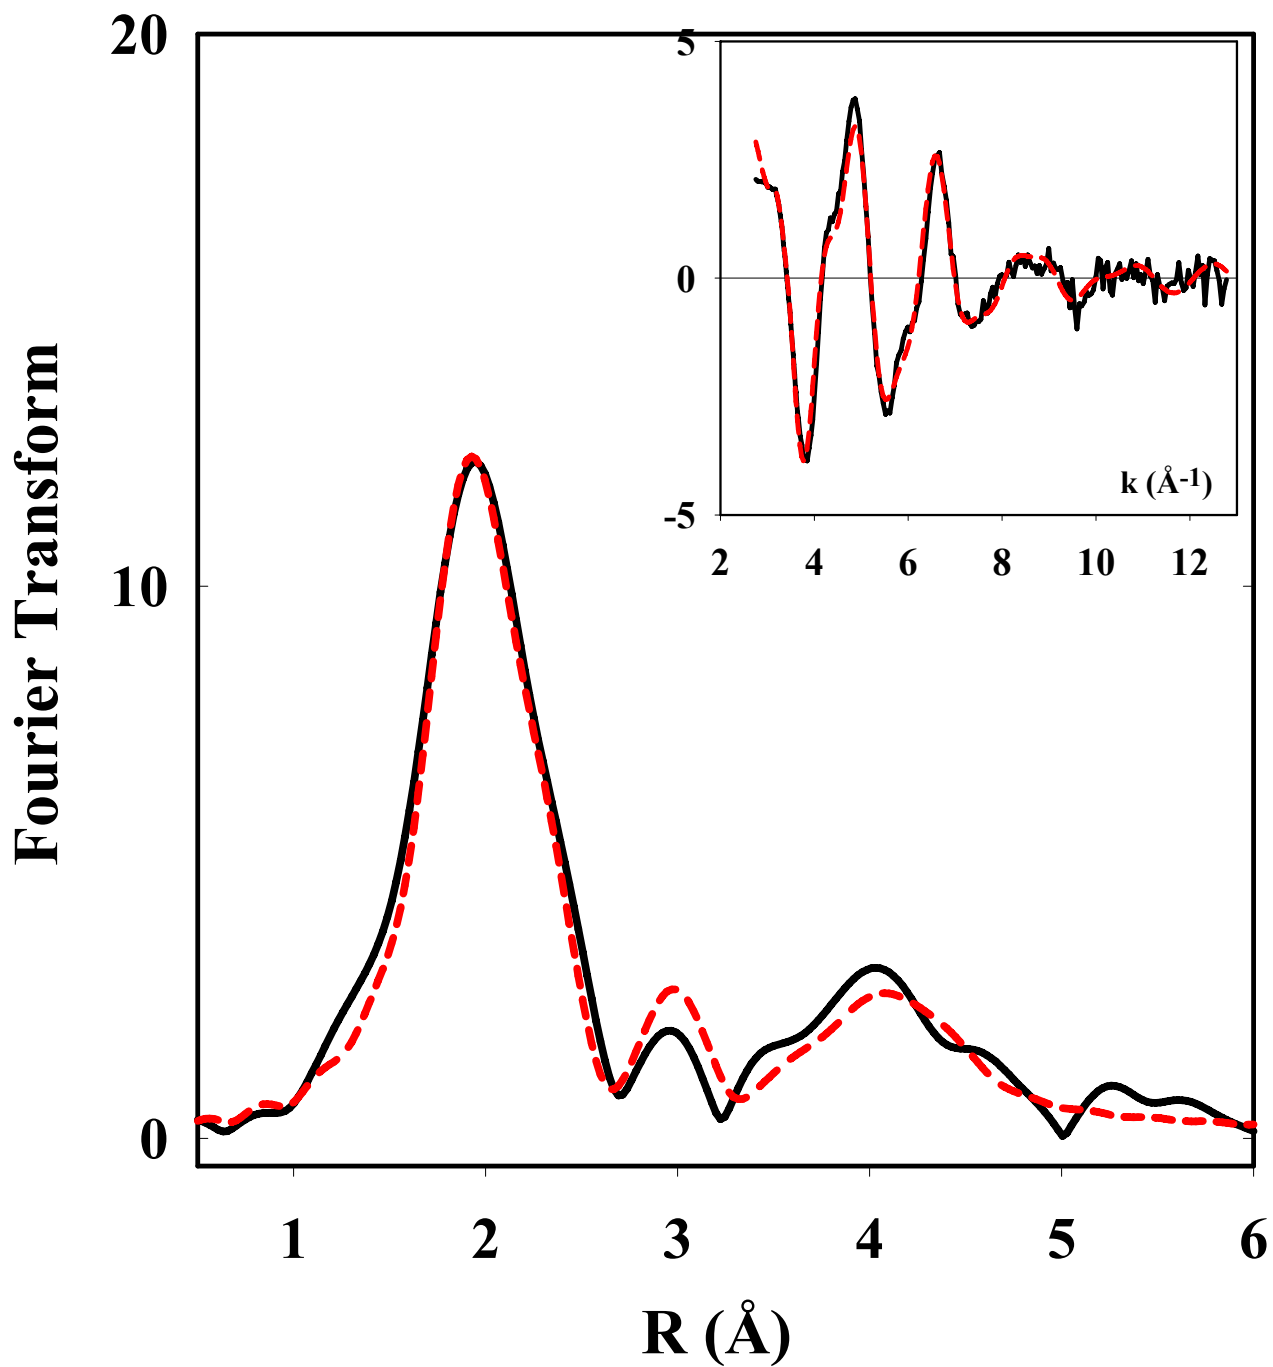

Fig. S2. Experimental versus simulated Fourier transform and EXAFS (inset) for reduced TBM at pH 7 using one shell of two equivalent histidines and no S ligation, with the parameters as listed in fit C of Table S1.

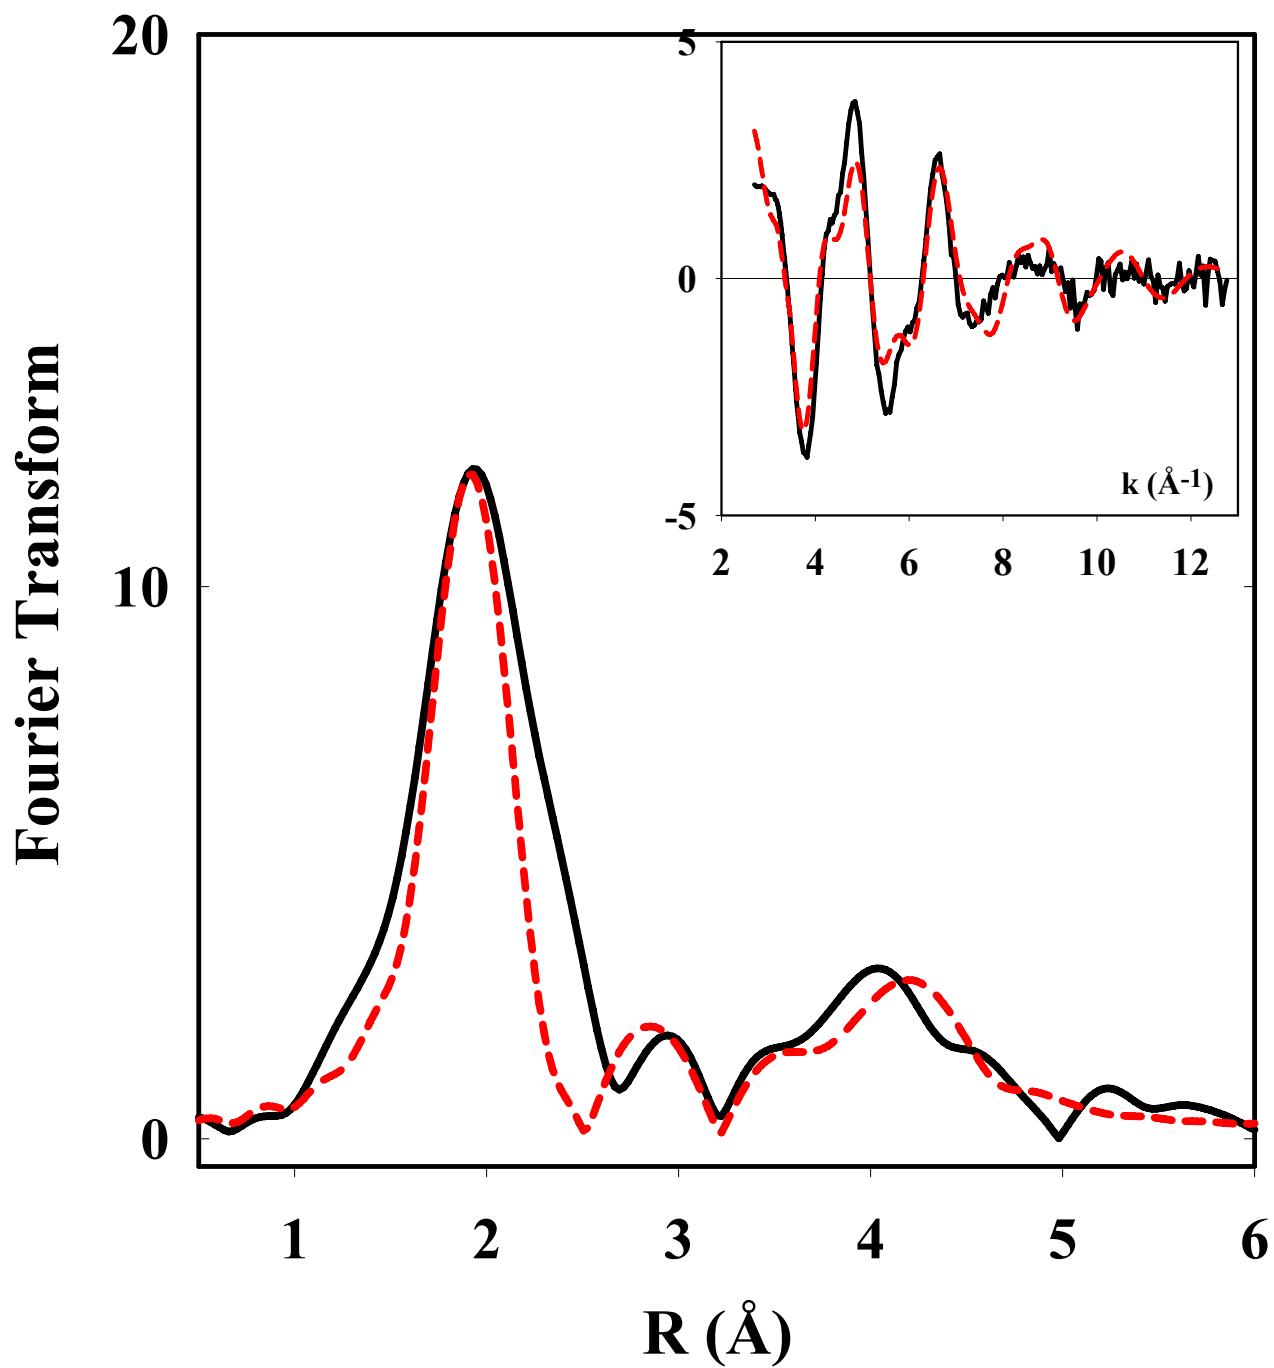

Supplement: 775_2010_677_MOESM1_ESM.pdf [file 775_2010_677_MOESM1_ESM.pdf]
